# Supplementary material
Source: HighWire-hosted journal article supplement (https://www.cmaj.ca/highwire/filestream/59114/field_highwire_adjunct_files/0/edit-gaza-1-at.pdf)
Supplement: edit-gaza-1-at.pdf [file edit-gaza-1-at.pdf]

## Appendix 1: References

1. United Nations Office for the Coordination of Humanitarian Affairs (OCHA). *Occupied Palestinian Territory: Gaza Emergency Situation report (as of 4 September 2014, 08:00 hrs)*. Available: [www.ochaopt.org/documents/ocha\\_opt\\_sitrep\\_04\\_09\\_2014.pdf](http://www.ochaopt.org/documents/ocha_opt_sitrep_04_09_2014.pdf) [accessed 2014 Sept. 11].
2. MacIntyre D. Gaza conflict: As Israel and Hamas both claim victory, hundreds of children suffer life-changing injuries. *The Independent* 2014 Aug. 7. Available: [www.independent.co.uk/news/world/middle-east/gaza-conflict-as-israel-and-hamas-both-claim-victory-hundreds-of-children-suffer-lifechanging-injuries-9655419.html](http://www.independent.co.uk/news/world/middle-east/gaza-conflict-as-israel-and-hamas-both-claim-victory-hundreds-of-children-suffer-lifechanging-injuries-9655419.html) [accessed 2014 Sept. 11].
3. Mallen S. Doctor still trying to bring injured Gaza children to Ontario. *Global News* 2014 Sept. 5. Available: <http://globalnews.ca/news/1547173/doctor-still-trying-to-bring-injured-gaza-children-to-ontario/> [accessed 2014 Sept. 11].
4. Medecins Sans Frontieres. *Gaza: Medical care through war and truce*. 2014 Aug. 27. Available: [www.msf.org/article/gaza-medical-care-through-war-and-truce](http://www.msf.org/article/gaza-medical-care-through-war-and-truce) [accessed 2014 Sept. 11].
5. Medecins Sans Frontieres. *Gaza: A night at the Al-Shifa Hospital*. 2014 Jul 23. Available: [www.msf.org/article/gaza-night-al-shifa-hospital](http://www.msf.org/article/gaza-night-al-shifa-hospital) [accessed 2014 Sept. 11].
6. Hasson N. Gazan patients hospitalized in East Jerusalem, looking for hope and answers. *Haaretz* 2014 Aug. 4. Available: [www.haaretz.com/news/national/.premium-1.608638](http://www.haaretz.com/news/national/.premium-1.608638) [accessed 2014 Sept. 11].
7. Israel Ministry of Foreign Affairs. *Humanitarian aid to Gaza continues*. 2014 Aug. 27. Available: <http://mfa.gov.il/MFA/ForeignPolicy/Peace/Humanitarian/Pages/Israeli-humanitarian-aid-continues-10-Jul-2014.aspx> [accessed 2014 Sept. 11].
8. Petitioning Stephen Harper. *Bring 100 Palestinian children to Canada for desperately needed medical attention*. Available: [www.change.org/p/stephen-harper-bring-100-palestinian-children-to-canada-for-desperately-needed-medical-attention?recruiter=135263240&utm\\_campaign=share\\_facebook\\_mobile&utm\\_medium=facebook&utm\\_source=share\\_petition](http://www.change.org/p/stephen-harper-bring-100-palestinian-children-to-canada-for-desperately-needed-medical-attention?recruiter=135263240&utm_campaign=share_facebook_mobile&utm_medium=facebook&utm_source=share_petition) [accessed 2014 Sept. 11].
9. Gaza children receive treatment in Austria. *The Local* 2014 Sept. 9. Available: [www.thelocal.at/20140909/gaza-children-go-to-austria-for-medical-treatment](http://www.thelocal.at/20140909/gaza-children-go-to-austria-for-medical-treatment) [accessed 2014 Sept. 11].
10. Doctors for Gaza Children. Available: [www.activism.com/en\\_CA/petition/doctors-for-gaza-children/63428](http://www.activism.com/en_CA/petition/doctors-for-gaza-children/63428) [accessed 2014 Sept. 11].
